# Supplementary material for: Effective aperture tuning of a zeolitic-imidazole framework CdIF-1 by controlled thermal amorphization
Source: Royal Society of Chemistry journal article supplement (doi:10.1039/d1ta10706b), 2022-01-01
Supplement: d1ta10706b1.pdf [file d1ta10706b1.pdf]

## Supporting Information

### Effective Aperture Tuning of a Zeolitic-Imidazole Framework CdIF-1 by Controlled Thermal Amorphization

Sunghwan Park<sup>a</sup> and Hae-Kwon Jeong<sup>\*ab</sup>

<sup>a</sup> Artie McFerrin Department of Chemical Engineering and <sup>b</sup> Department of Materials Science and Engineering, Texas A&M University, 3122 TAMU, College Station, TX 77843-3122, United States

\* Corresponding author:

H.-K. Jeong (E-mail address: [hjeong7@tamu.edu](mailto:hjeong7@tamu.edu), Phone: +1-979-862-4850, Fax: +1-979-845-6446)

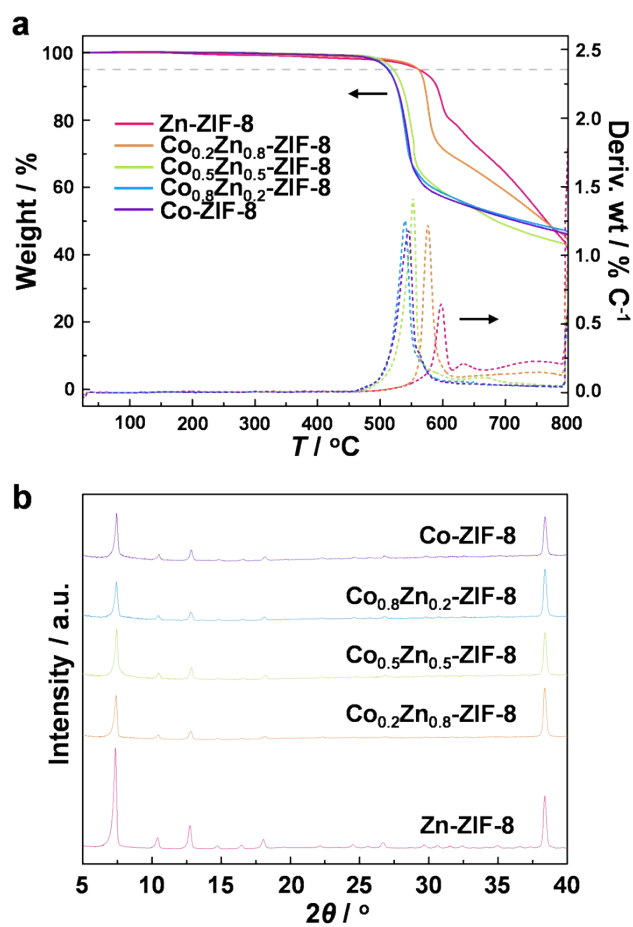

**Figure S1.** (a) TGA thermogram of ZIF-8, ZIF-67, and CoZn-ZIF-8. (b) XRD patterns of ZIF-8, ZIF-67, and CoZn-ZIF-8 heat-treated at  $T_d$  (95 wt%) determined in (a).

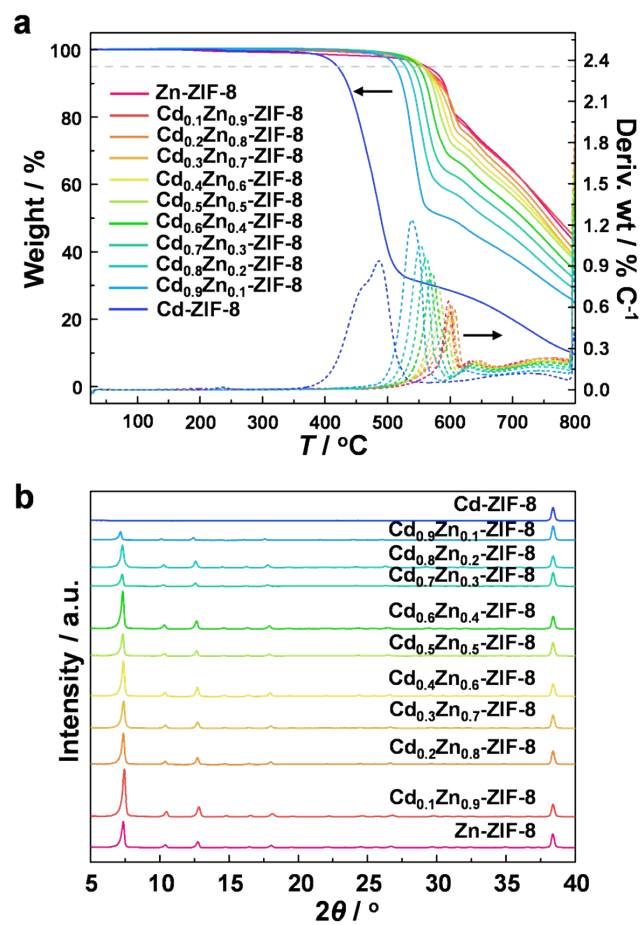

**Figure S2.** (a) TGA thermogram of ZIF-8, CdIF-1, and CdZn-ZIF-8. (b) XRD patterns of ZIF-8, CdIF-1, and CdZn-ZIF-8 heat-treated at T<sub>d</sub> (95 wt%) determined in (a).

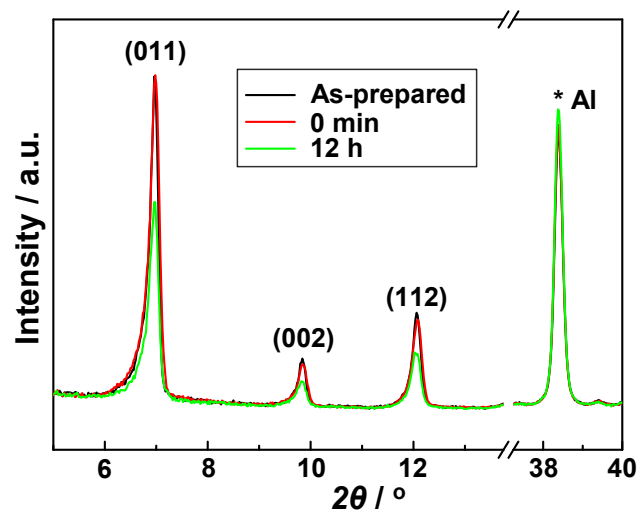

**Figure S3.** XRD patterns of CdIF-1 heat-treated at 220 °C with different soaking times.

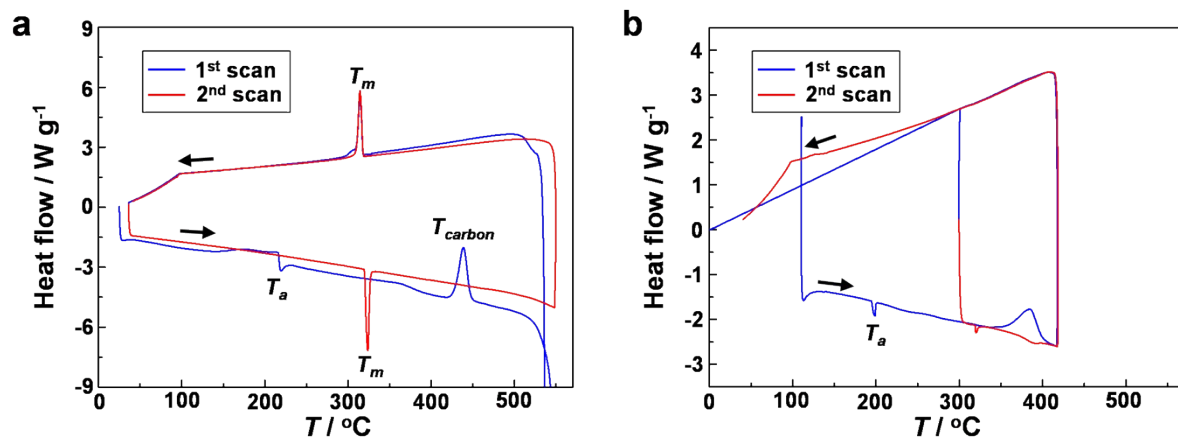

**Figure S4.** DSC curves of CdIF-1 with the final temperature of (a) 550 °C and (b) 420 °C.

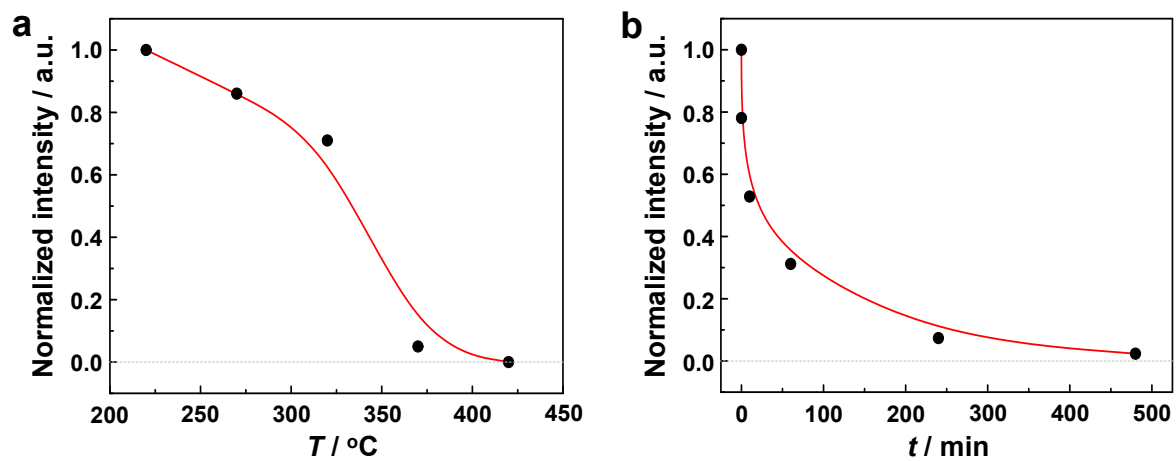

**Figure S5.** Normalized (110) peak intensity of XRD patterns of CdIF-1 with (a) different heating temperatures and (b) different soaking times at 320 °C.

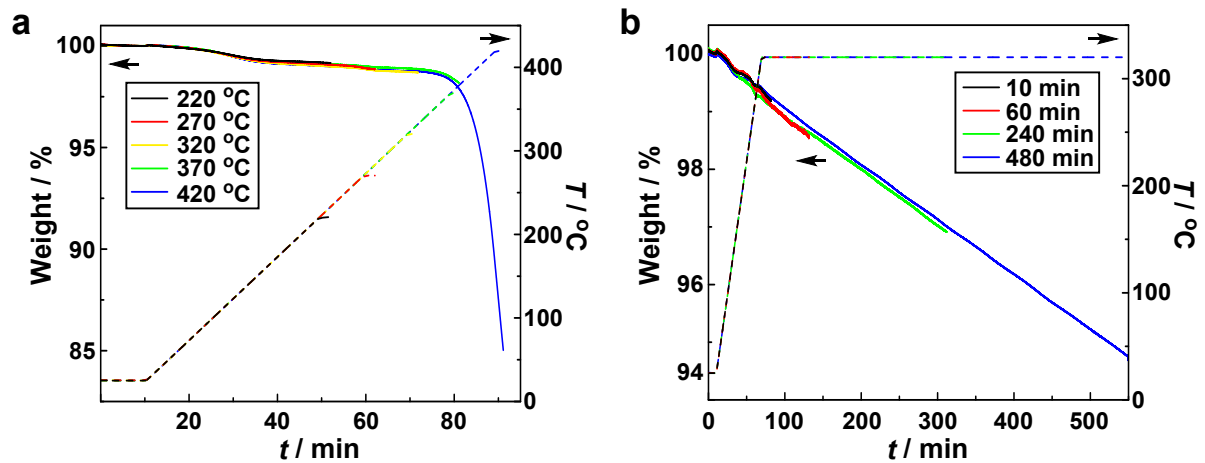

**Figure S6.** TGA thermogram of CdIF-1 with (a) different heating temperatures and (b) different soaking times at 320 °C.

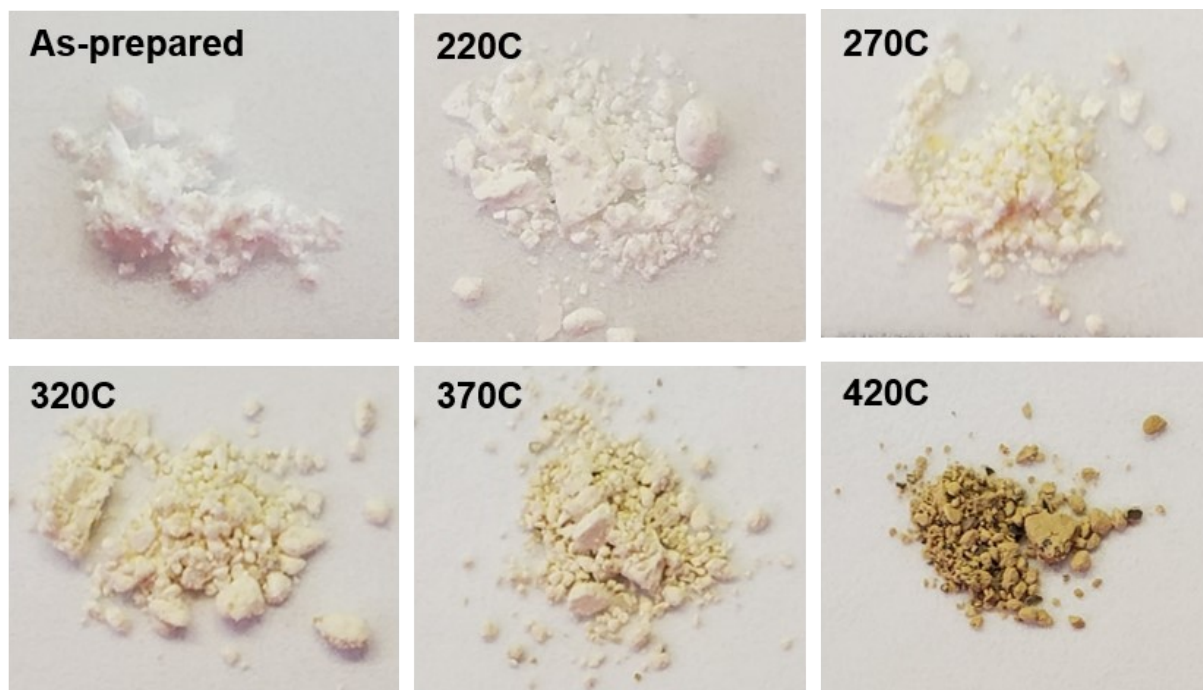

**Figure S7.** Photograph of CdIF-1 and  $a_T$ CdIF-1 samples with different heating temperatures. All samples were immediately cooled naturally without soaking time.



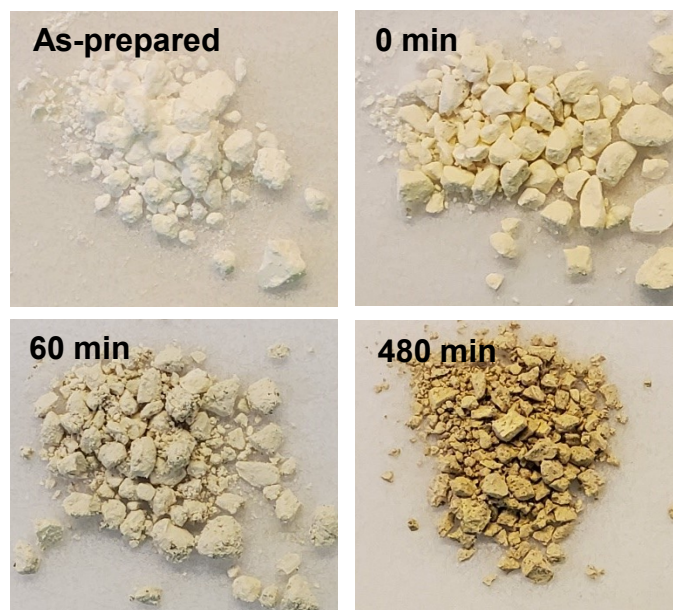

**Figure S8.** Photograph of CdIF-1 and a<sub>7</sub>CdIF-1 samples with different soaking time at 320 °C.

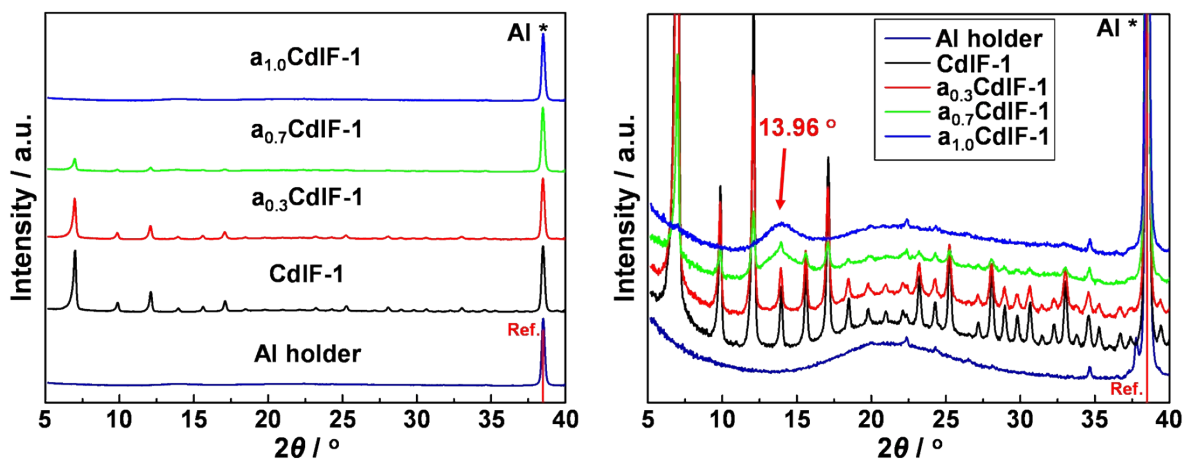

**Figure S9.** XRD patterns of CdIF-1 and  $a_T$ CdIF-1. The right figure is the rearranged image of the left figure. The reference peak was taken by aluminum syn. 00-004-0787 (JCPDS).

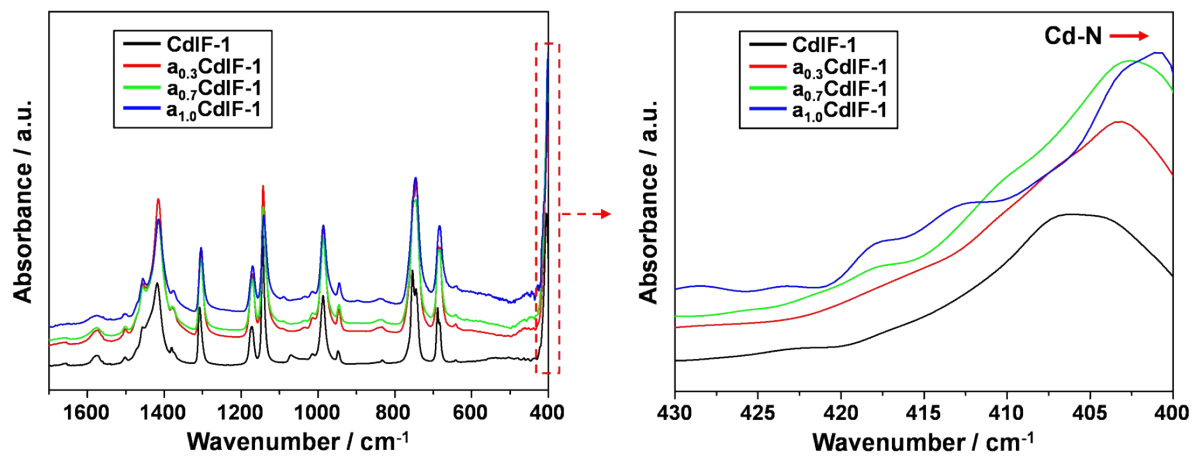

**Figure S10.** FT-IR spectra of CdIF-1 and  $a_T$  CdIF-1.

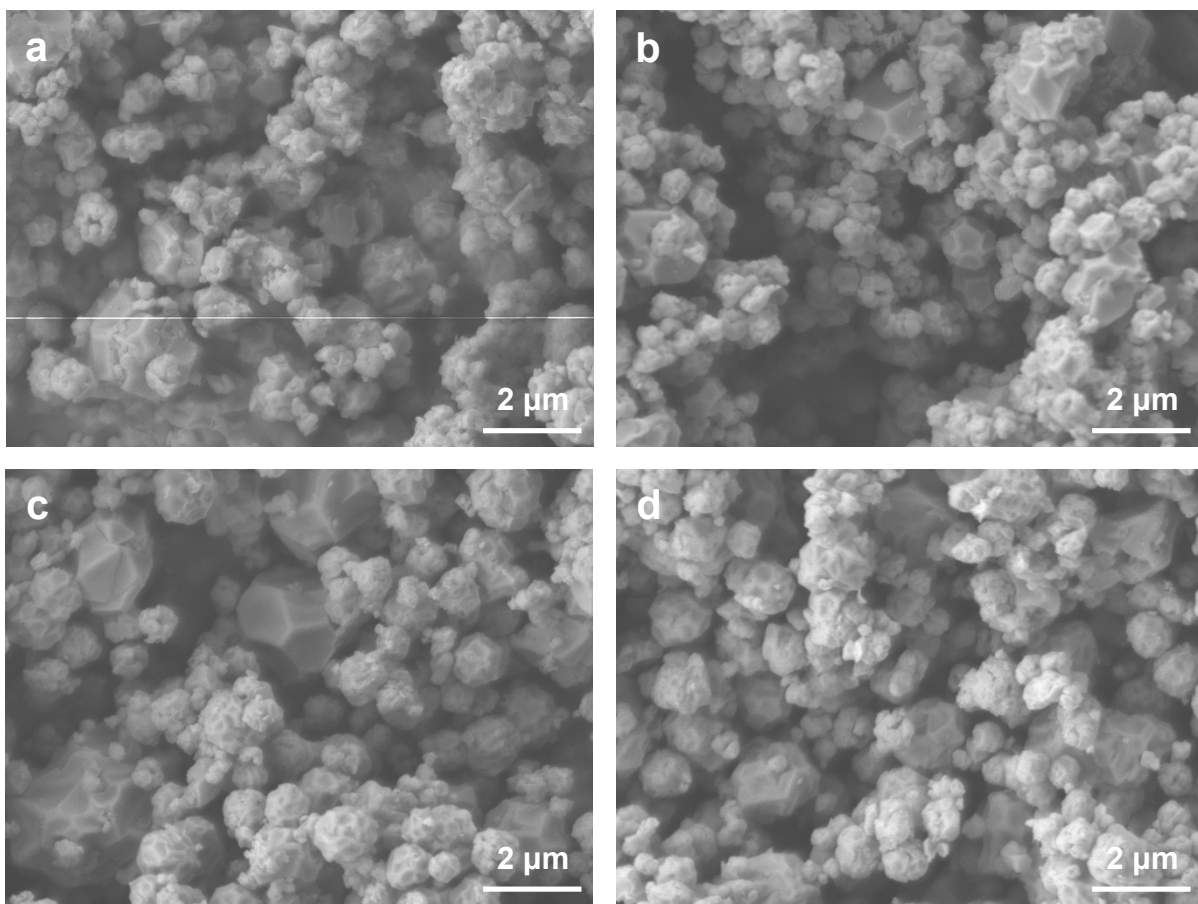

**Figure S11.** SEM images of (a) CdIF-1, (b) a<sub>0.3</sub>CdIF-1, (c) a<sub>0.7</sub>CdIF-1, and (d) a<sub>1.0</sub>CdIF-1.

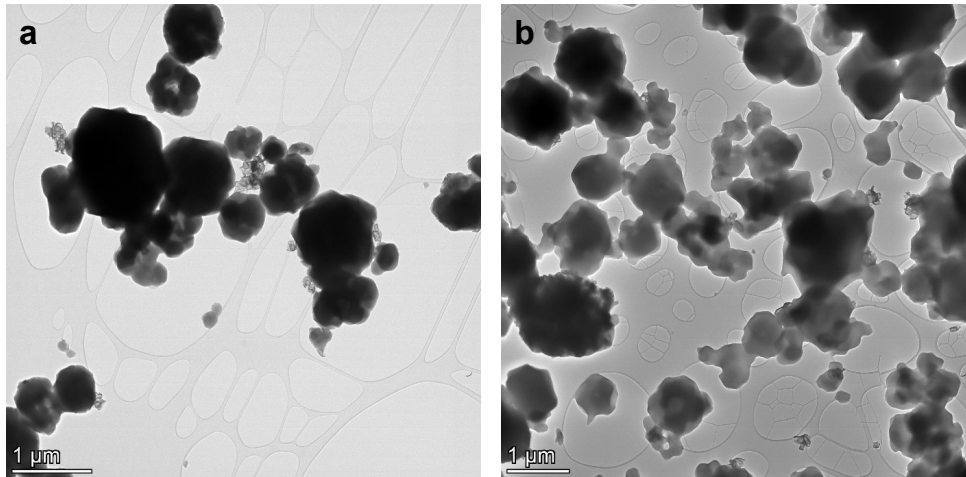

**Figure S12.** TEM images of (a) CdIF-1 and (b) a<sub>1.0</sub>CdIF-1 at low magnifications.

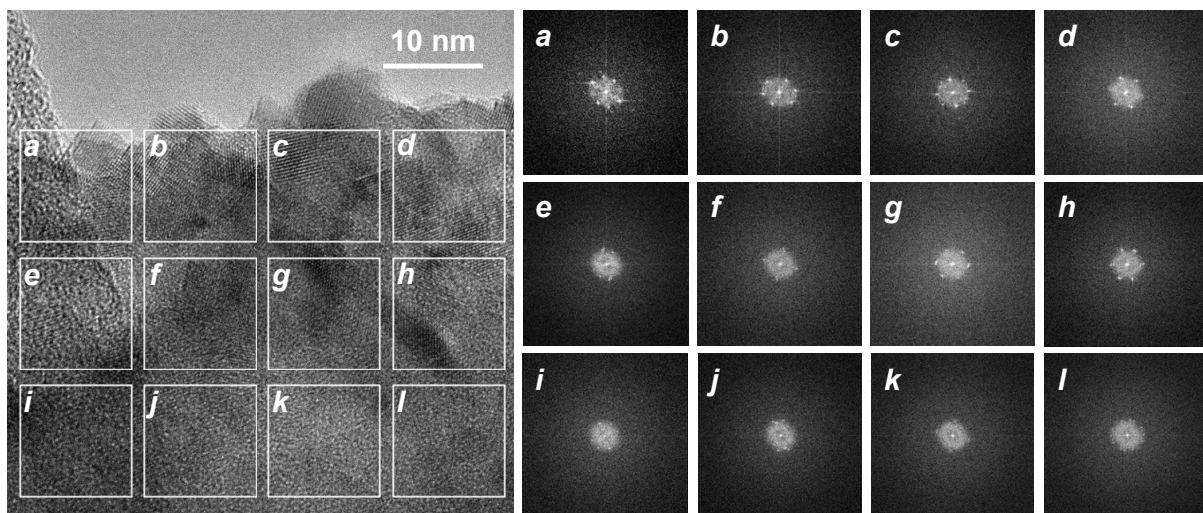

**Figure S13.** HRTEM image of  $a_{0.3}\text{CdIF-1}$  and the corresponding FFT diffractions at different positions.

**Table S1.** BET surface area and pore volume determined by N<sub>2</sub> physisorption at 77 K

|                                                    | <b>CdIF-1</b> | <b>a<sub>0.3</sub>CdIF-1</b> | <b>a<sub>0.7</sub>CdIF-1</b> | <b>a<sub>1.0</sub>CdIF-1</b> |
|----------------------------------------------------|---------------|------------------------------|------------------------------|------------------------------|
| BET surface area / cm <sup>2</sup> g <sup>-1</sup> | 1412.7        | ~ 400                        | 91.7                         | 16.9                         |
| Pore volume / cm <sup>3</sup> g <sup>-1</sup>      | 0.66          | ~ 0.1                        | 0.04                         | 0.007                        |

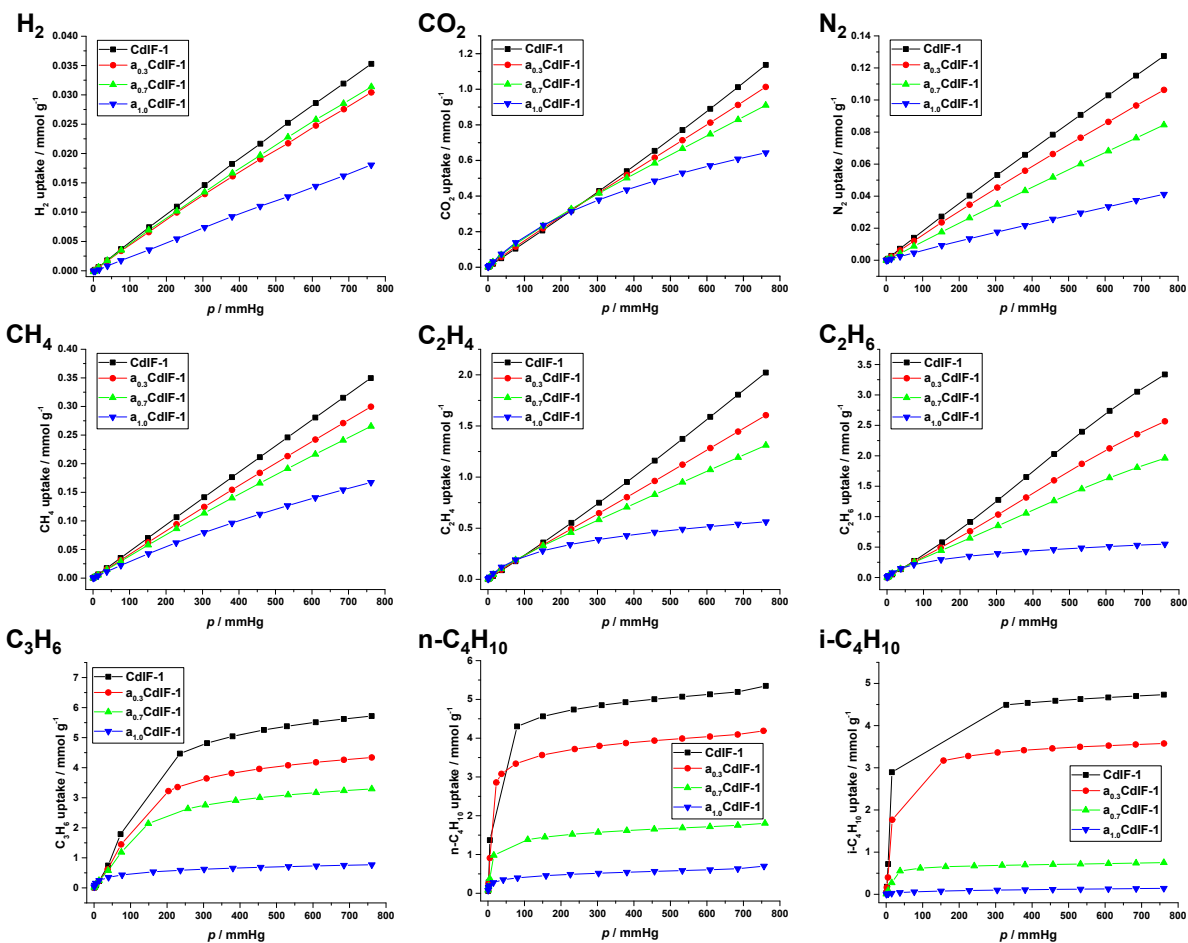

Figure S14. Adsorption isotherms of various gas molecules for CdIF-1 and  $a_7$ CdIF-1 at 273 K.



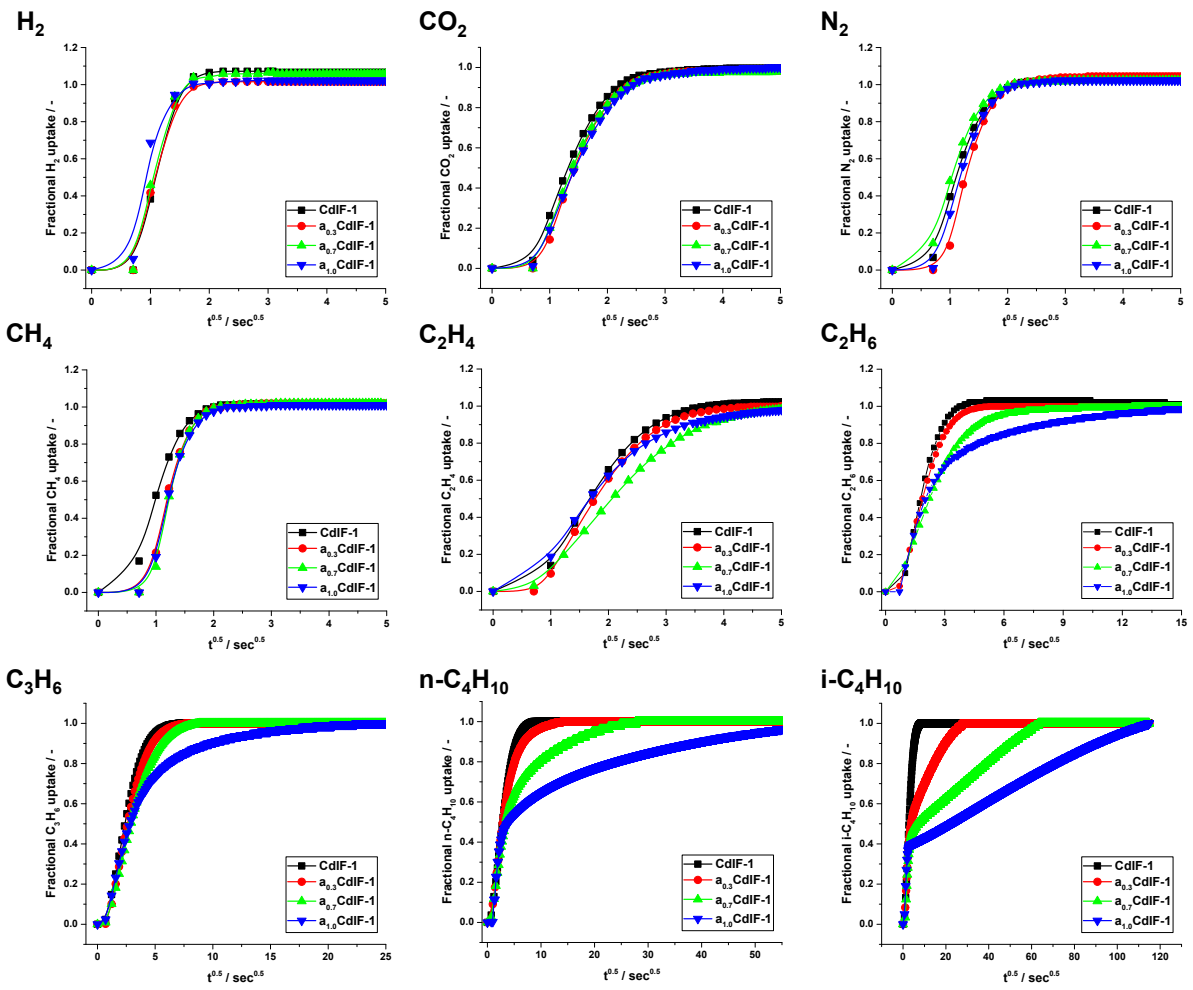

Figure S15. Kinetic uptakes of various gas molecules for CdIF-1 and  $a_7$ -CIF-1 at 273 K.

**Table S2.** Langmuir fitting parameters

| Sample                  | Gas                              | 273 K                           |                             | 298 K                           |                             | 323 K                           |                             |
|-------------------------|----------------------------------|---------------------------------|-----------------------------|---------------------------------|-----------------------------|---------------------------------|-----------------------------|
|                         |                                  | $C_s /$<br>mmol g <sup>-1</sup> | $b /$<br>mmHg <sup>-1</sup> | $C_s /$<br>mmol g <sup>-1</sup> | $b /$<br>mmHg <sup>-1</sup> | $C_s /$<br>mmol g <sup>-1</sup> | $b /$<br>mmHg <sup>-1</sup> |
| CdIF-1                  | C <sub>3</sub> H <sub>6</sub>    | 7.42                            | 0.005                       | 8.65                            | 0.002                       | n/a                             | n/a                         |
|                         | C <sub>3</sub> H <sub>8</sub>    | 6.06                            | 0.009                       | 6.14                            | 0.004                       | n/a                             | n/a                         |
|                         | n-C <sub>4</sub> H <sub>10</sub> | 5.24                            | 0.055                       | 4.83                            | 0.025                       | 4.64                            | 0.009                       |
|                         | i-C <sub>4</sub> H <sub>10</sub> | 4.79                            | 0.061                       | 4.58                            | 0.019                       | 4.52                            | 0.007                       |
| a <sub>0.3</sub> CdIF-1 | C <sub>3</sub> H <sub>6</sub>    | 5.44                            | 0.006                       | 6.28                            | 0.002                       | n/a                             | n/a                         |
|                         | C <sub>3</sub> H <sub>8</sub>    | 4.56                            | 0.009                       | 4.70                            | 0.003                       | n/a                             | n/a                         |
|                         | n-C <sub>4</sub> H <sub>10</sub> | 4.08                            | 0.072                       | 3.74                            | 0.026                       | 3.28                            | 0.010                       |
|                         | i-C <sub>4</sub> H <sub>10</sub> | 3.64                            | 0.045                       | 3.57                            | 0.019                       | 3.28                            | 0.006                       |
| a <sub>0.7</sub> CdIF-1 | C <sub>3</sub> H <sub>6</sub>    | 4.04                            | 0.006                       | 4.48                            | 0.002                       | 2.55                            | 0.001                       |
|                         | C <sub>3</sub> H <sub>8</sub>    | 3.40                            | 0.010                       | 3.45                            | 0.003                       | 1.96                            | 0.001                       |
|                         | n-C <sub>4</sub> H <sub>10</sub> | 1.71                            | 0.065                       | 1.54                            | 0.025                       | 1.27                            | 0.010                       |
|                         | i-C <sub>4</sub> H <sub>10</sub> | 0.76                            | 0.043                       | 1.00                            | 0.013                       | 0.35                            | 0.004                       |
| a <sub>1.0</sub> CdIF-1 | C <sub>2</sub> H <sub>4</sub>    | 0.71                            | 0.004                       | 0.56                            | 0.002                       | 0.55                            | 0.001                       |
|                         | C <sub>2</sub> H <sub>6</sub>    | 0.64                            | 0.006                       | 0.50                            | 0.003                       | 0.43                            | 0.002                       |
|                         | C <sub>3</sub> H <sub>6</sub>    | 0.76                            | 0.021                       | 0.60                            | 0.009                       | 0.51                            | 0.004                       |
|                         | C <sub>3</sub> H <sub>8</sub>    | 0.61                            | 0.023                       | 0.49                            | 0.011                       | 0.38                            | 0.005                       |
|                         | n-C <sub>4</sub> H <sub>10</sub> | 0.60                            | 0.045                       | 0.47                            | 0.026                       | 0.33                            | 0.007                       |
|                         | i-C <sub>4</sub> H <sub>10</sub> | 0.16                            | 0.007                       | 0.24                            | 0.012                       | 0.19                            | 0.004                       |

**Table S3.** Corrected diffusivities ( $D_o$ ) at 273K

| Unit: cm <sup>2</sup> sec <sup>-1</sup> | CdIF-1                                                 | a <sub>0,3</sub> CdIF-1                                | a <sub>0,7</sub> CdIF-1                                | a <sub>1,0</sub> CdIF-1                                |
|-----------------------------------------|--------------------------------------------------------|--------------------------------------------------------|--------------------------------------------------------|--------------------------------------------------------|
| H <sub>2</sub>                          | 2.19 x 10 <sup>-9</sup> ±<br>1.66 x 10 <sup>-10</sup>  | 2.54 x 10 <sup>-9</sup> ±<br>3.89 x 10 <sup>-10</sup>  | 1.21 x 10 <sup>-9</sup> ±<br>5.88 x 10 <sup>-10</sup>  | 1.40 x 10 <sup>-9</sup> ±<br>8.46 x 10 <sup>-10</sup>  |
| N <sub>2</sub>                          | 2.80 x 10 <sup>-10</sup> ±<br>3.74 x 10 <sup>-11</sup> | 2.70 x 10 <sup>-10</sup> ±<br>4.09 x 10 <sup>-11</sup> | 1.53 x 10 <sup>-10</sup> ±<br>6.64 x 10 <sup>-11</sup> | 2.74 x 10 <sup>-10</sup> ±<br>1.33 x 10 <sup>-11</sup> |
| CH <sub>4</sub>                         | 5.98 x 10 <sup>-10</sup> ±<br>7.04 x 10 <sup>-11</sup> | 5.61 x 10 <sup>-10</sup> ±<br>1.51 x 10 <sup>-11</sup> | 3.42 x 10 <sup>-10</sup> ±<br>1.48 x 10 <sup>-10</sup> | 6.62 x 10 <sup>-10</sup> ±<br>1.83 x 10 <sup>-10</sup> |
| CO <sub>2</sub>                         | 7.93 x 10 <sup>-10</sup> ±<br>2.38 x 10 <sup>-11</sup> | 7.37 x 10 <sup>-10</sup> ±<br>8.80 x 10 <sup>-11</sup> | 4.61 x 10 <sup>-10</sup> ±<br>1.99 x 10 <sup>-10</sup> | 8.31 x 10 <sup>-10</sup> ±<br>1.48 x 10 <sup>-10</sup> |
| C <sub>2</sub> H <sub>4</sub>           | 3.55 x 10 <sup>-10</sup> ±<br>3.61 x 10 <sup>-11</sup> | 3.34 x 10 <sup>-10</sup> ±<br>4.15 x 10 <sup>-11</sup> | 2.20 x 10 <sup>-10</sup> ±<br>4.57 x 10 <sup>-11</sup> | 2.50 x 10 <sup>-10</sup> ±<br>6.37 x 10 <sup>-11</sup> |
| C <sub>2</sub> H <sub>6</sub>           | 3.27 x 10 <sup>-10</sup> ±<br>7.31 x 10 <sup>-11</sup> | 2.36 x 10 <sup>-10</sup> ±<br>5.44 x 10 <sup>-11</sup> | 1.54 x 10 <sup>-10</sup> ±<br>5.15 x 10 <sup>-11</sup> | 1.58 x 10 <sup>-10</sup> ±<br>9.39 x 10 <sup>-11</sup> |
| C <sub>3</sub> H <sub>6</sub>           | 1.35 x 10 <sup>-10</sup> ±<br>2.14 x 10 <sup>-11</sup> | 1.06 x 10 <sup>-10</sup> ±<br>4.59 x 10 <sup>-12</sup> | 7.49 x 10 <sup>-11</sup> ±<br>2.49 x 10 <sup>-11</sup> | 6.06 x 10 <sup>-11</sup> ±<br>1.80 x 10 <sup>-11</sup> |
| C <sub>3</sub> H <sub>8</sub>           | 1.21 x 10 <sup>-10</sup> ±<br>1.45 x 10 <sup>-11</sup> | 7.05 x 10 <sup>-11</sup> ±<br>1.74 x 10 <sup>-11</sup> | 2.42 x 10 <sup>-11</sup> ±<br>9.94 x 10 <sup>-12</sup> | 3.11 x 10 <sup>-12</sup> ±<br>1.19 x 10 <sup>-12</sup> |
| n-C <sub>4</sub> H <sub>10</sub>        | 8.09 x 10 <sup>-11</sup> ±<br>2.44 x 10 <sup>-12</sup> | 5.55 x 10 <sup>-11</sup> ±<br>8.36 x 10 <sup>-12</sup> | 1.11 x 10 <sup>-11</sup> ±<br>6.89 x 10 <sup>-12</sup> | 1.17 x 10 <sup>-12</sup> ±<br>5.36 x 10 <sup>-13</sup> |
| i-C <sub>4</sub> H <sub>10</sub>        | 5.38 x 10 <sup>-11</sup> ±<br>2.03 x 10 <sup>-11</sup> | 6.55 x 10 <sup>-12</sup> ±<br>1.24 x 10 <sup>-12</sup> | 2.74 x 10 <sup>-13</sup> ±<br>9.94 x 10 <sup>-14</sup> | 7.66 x 10 <sup>-14</sup> ±<br>1.71 x 10 <sup>-14</sup> |

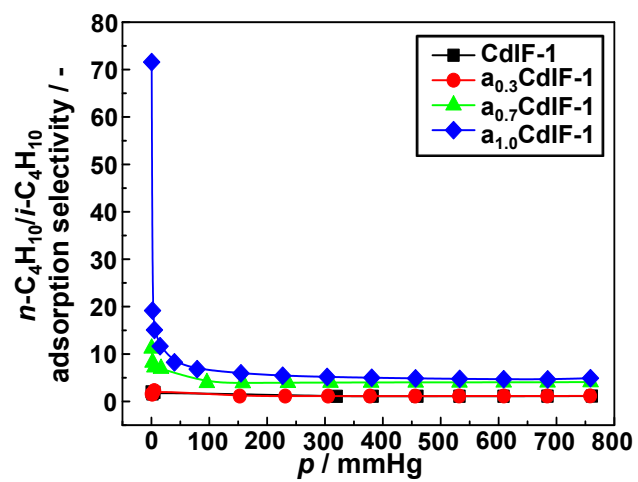

**Figure S16.** Ideal  $n\text{-C}_4\text{H}_{10}/i\text{-C}_4\text{H}_{10}$  adsorption selectivity of CdIF-1 and  $a_T$ CdIF-1.

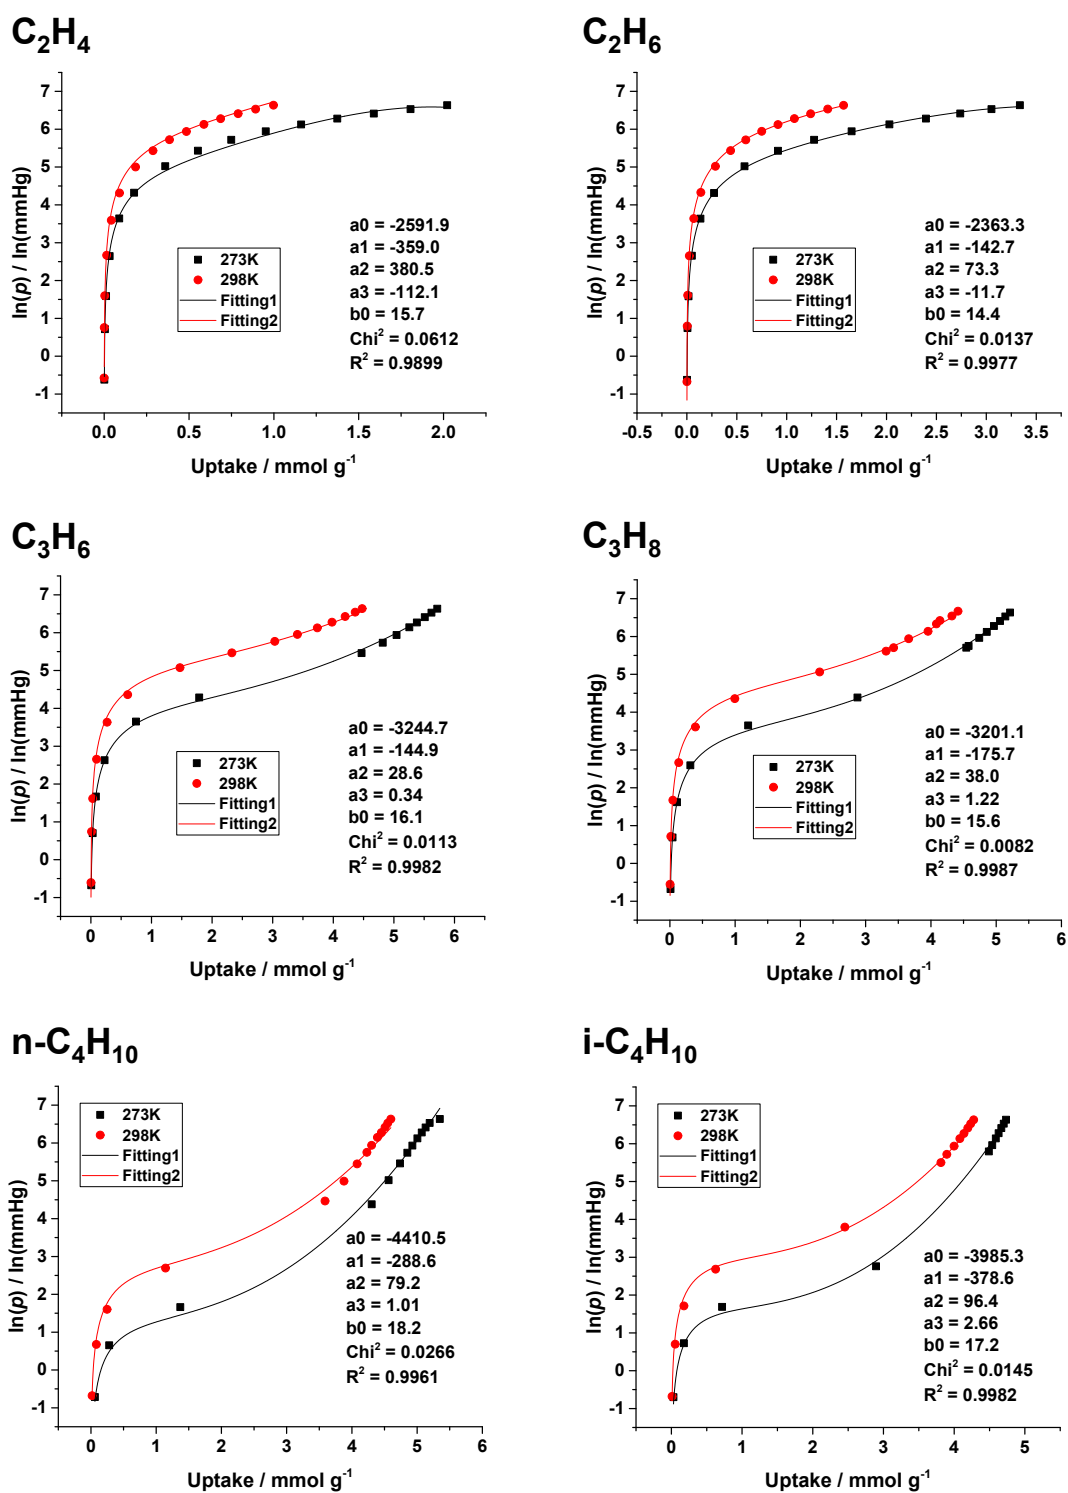

Figure S17. Virial fitting of adsorption isotherms for CdIF-1.

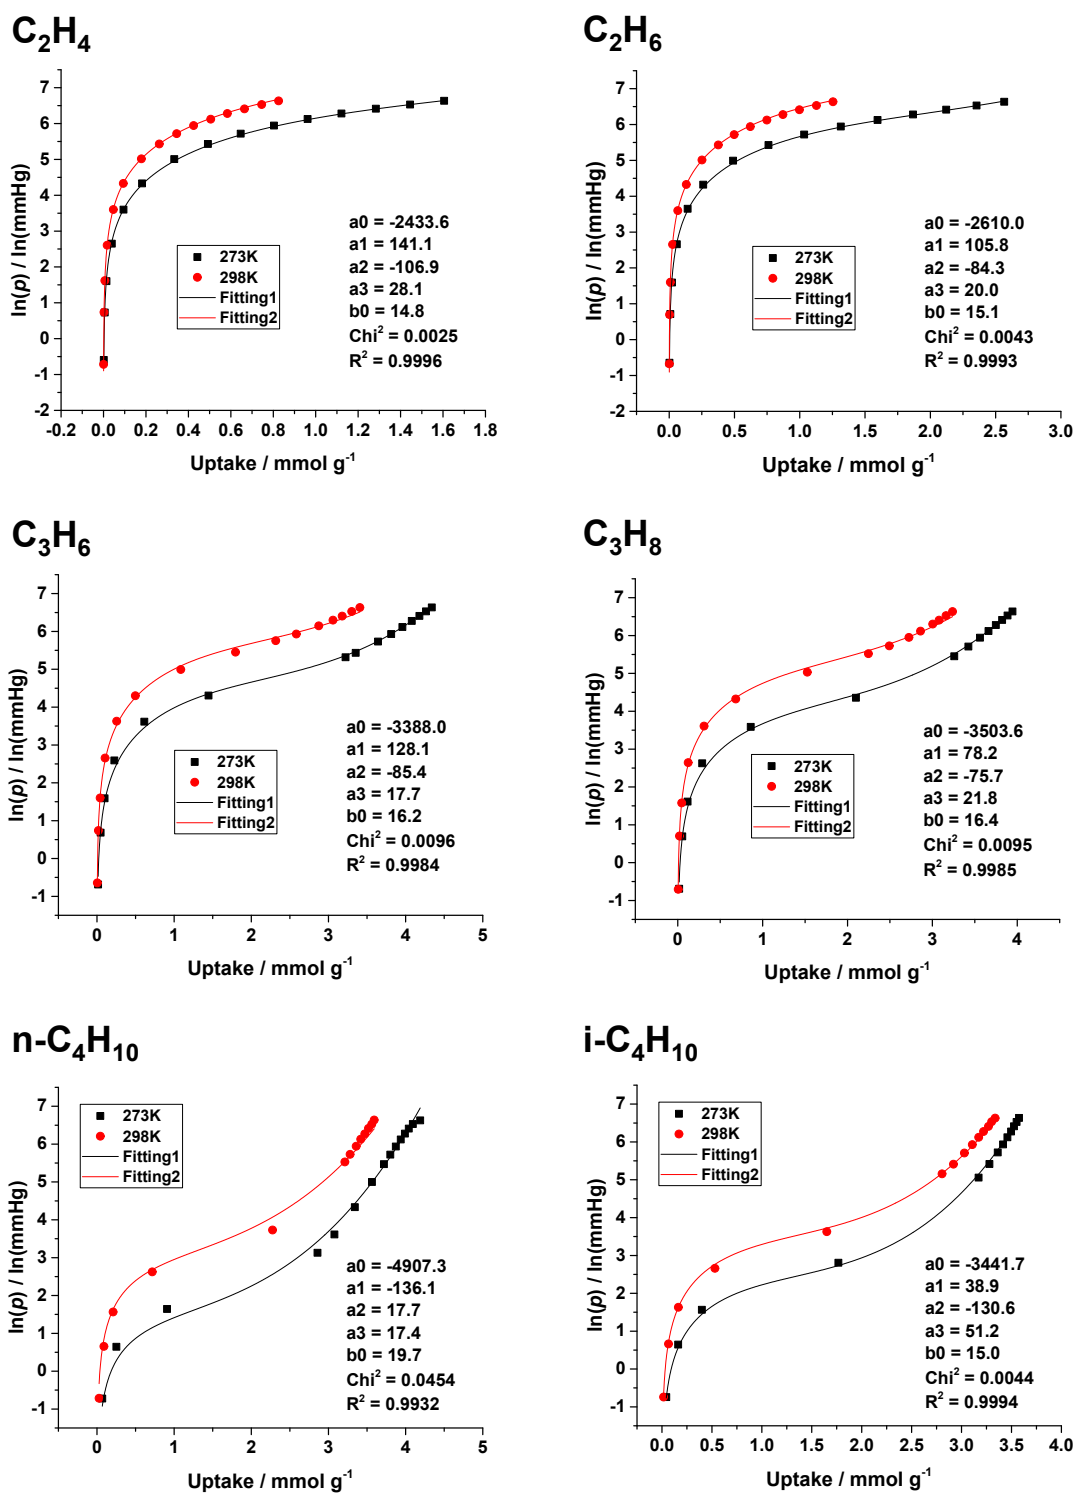

Figure S18. Virial fitting of adsorption isotherms for a<sub>0.3</sub>CdIF-1.

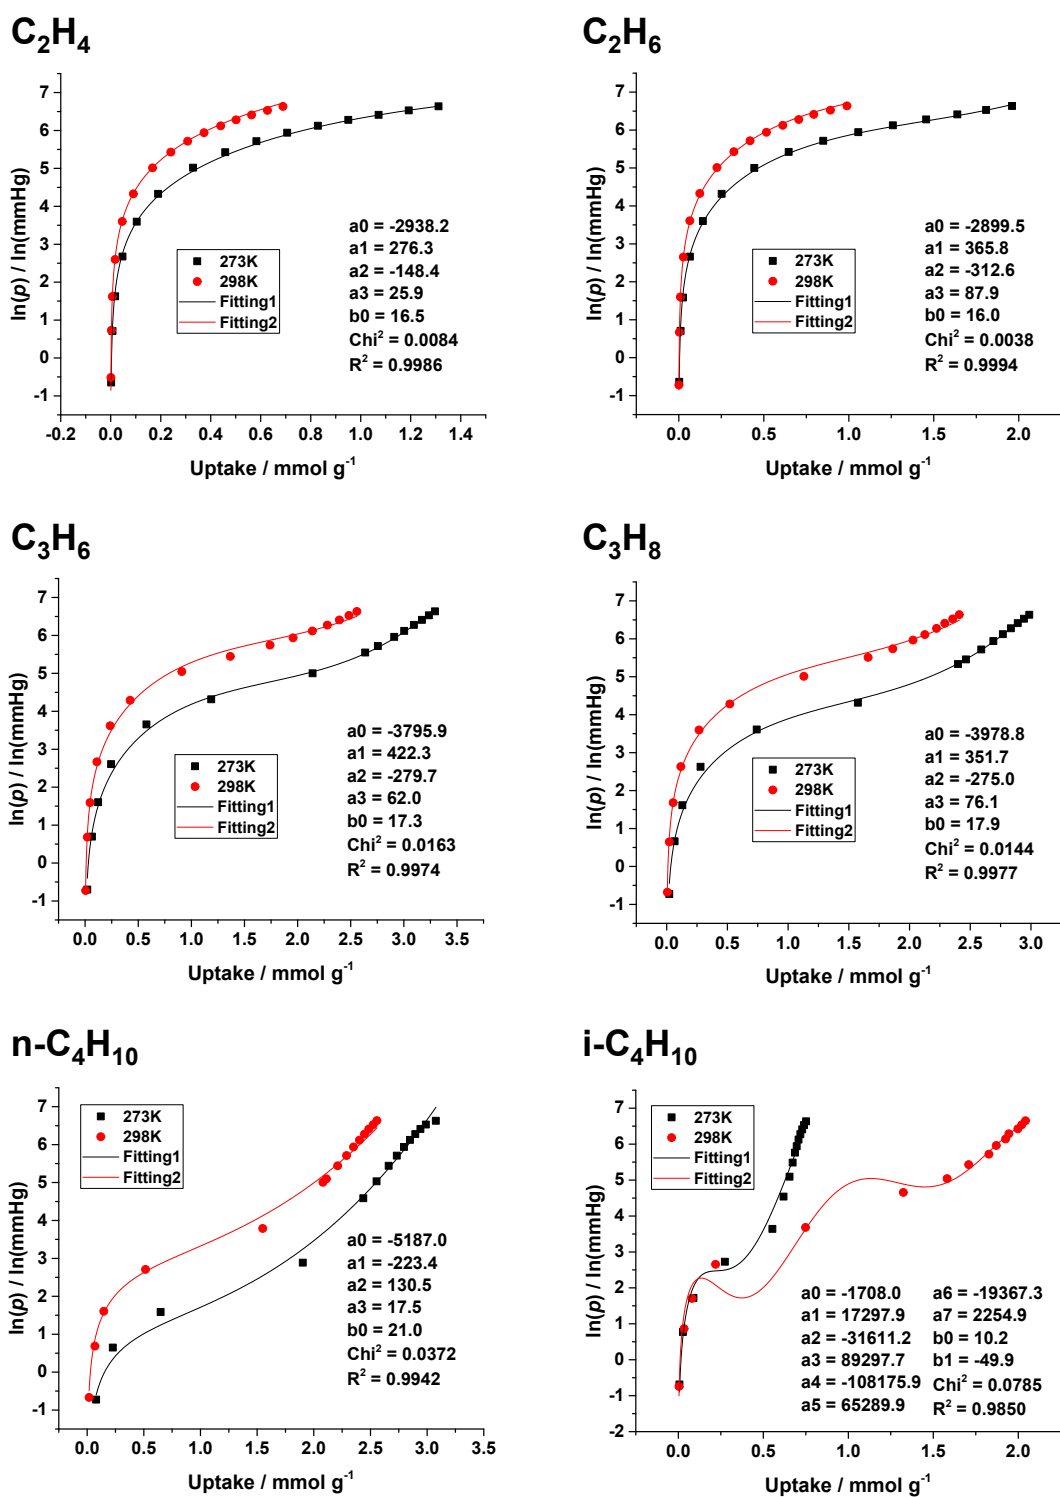

Figure S19. Virial fitting of adsorption isotherms for a<sub>0.7</sub>CdIF-1.

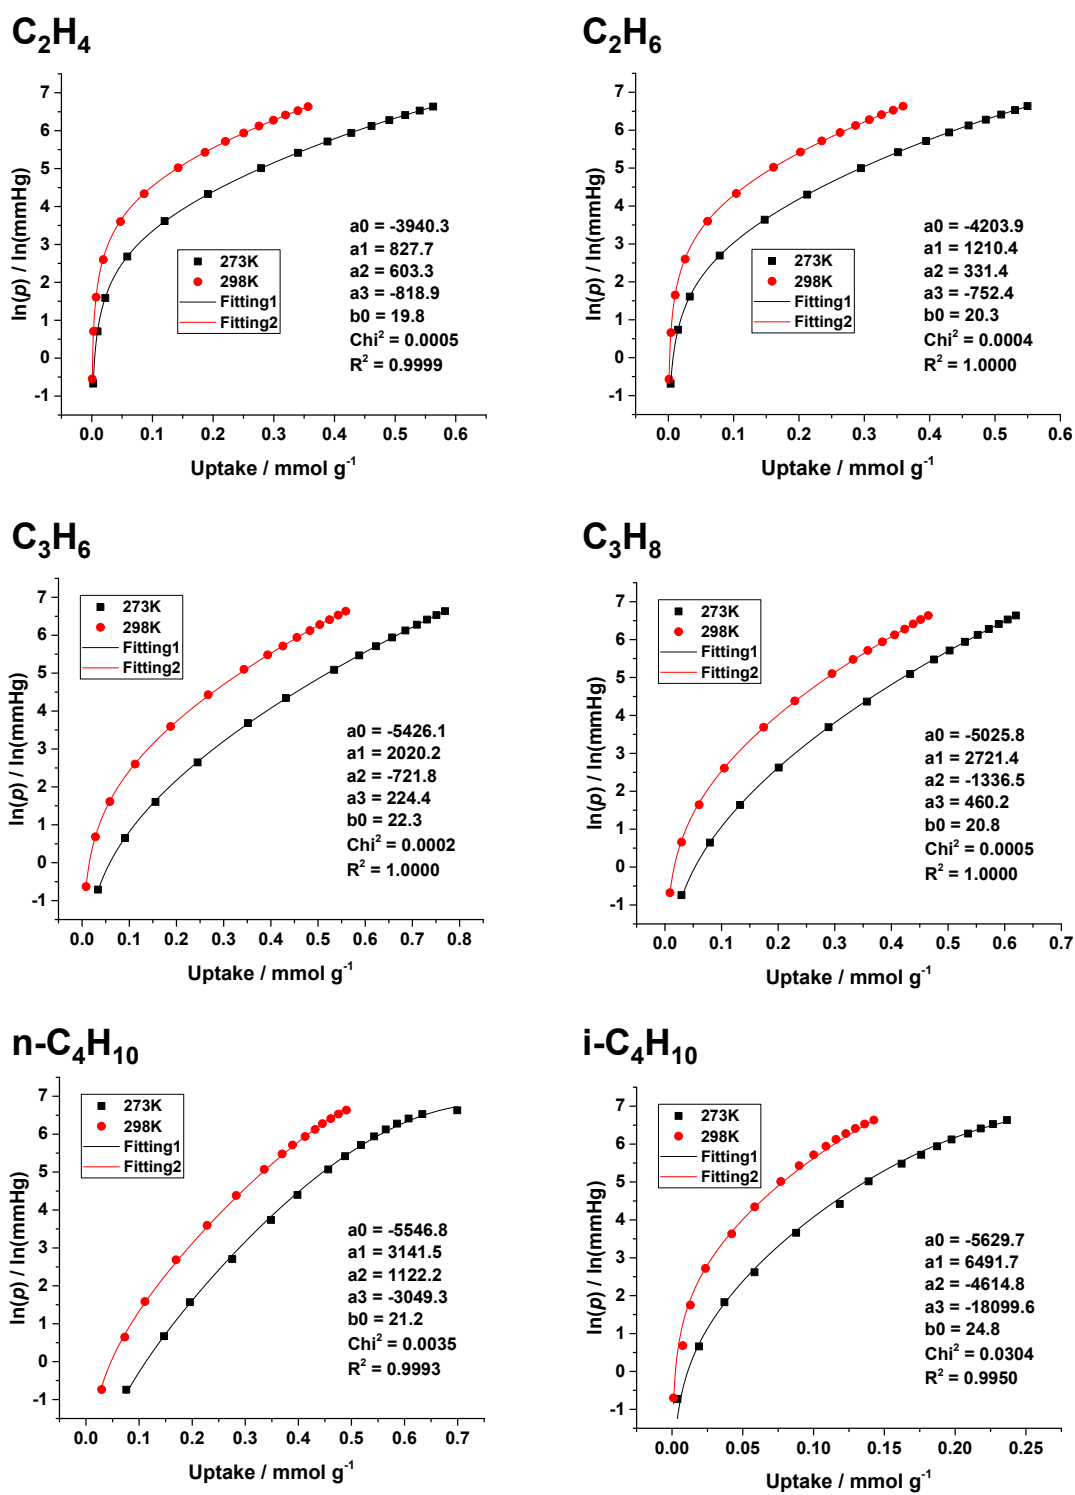

Figure S20. Virial fitting of adsorption isotherms for a<sub>1,0</sub>CdIF-1.



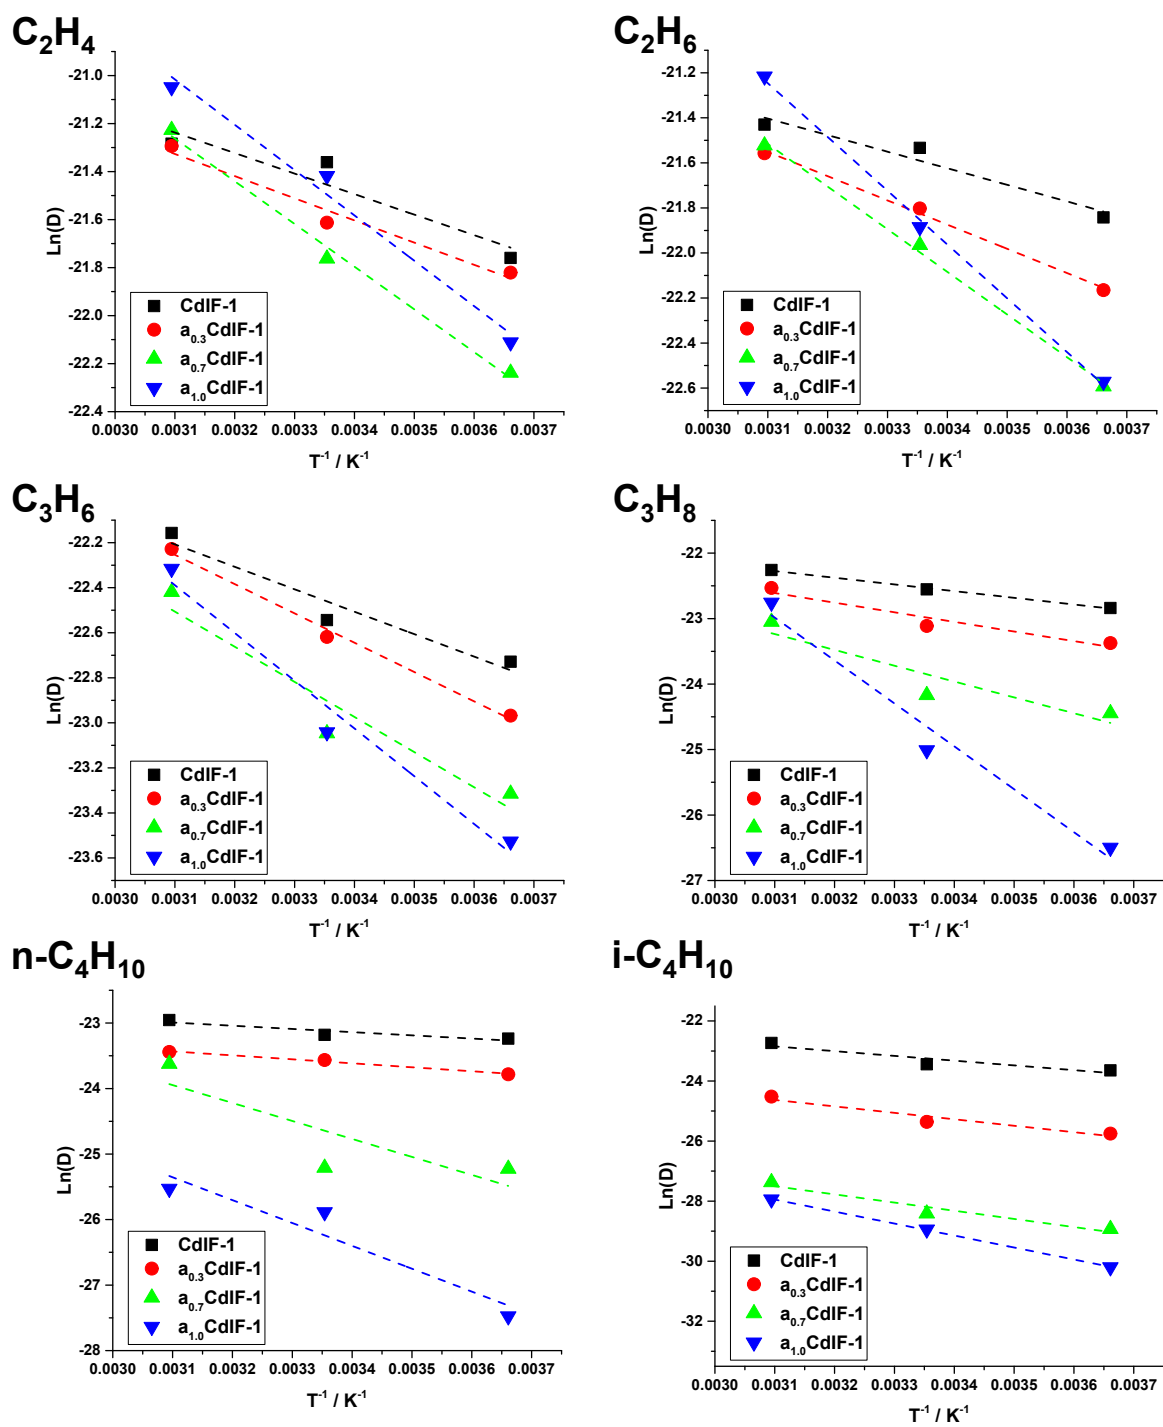

Figure S21. Arrhenius plots for the activation energy of diffusion ( $E_a$ ).

**Table S4.** Isotheric enthalpy of adsorption ( $\Delta H_{ads}^{\circ}$ )

| <b>Unit: kJ mol<sup>-1</sup></b> | <b>CdIF-1</b> | <b>a<sub>0.3</sub>CdIF-1</b> | <b>a<sub>0.7</sub>CdIF-1</b> | <b>a<sub>1.0</sub>CdIF-1</b> |
|----------------------------------|---------------|------------------------------|------------------------------|------------------------------|
| C <sub>2</sub> H <sub>4</sub>    | 21.5 ± 2.7    | 20.2 ± 0.5                   | 24.4 ± 1.0                   | 32.8 ± 0.3                   |
| C <sub>2</sub> H <sub>6</sub>    | 19.6 ± 1.3    | 21.7 ± 0.7                   | 24.1 ± 0.7                   | 35.0 ± 0.1                   |
| C <sub>3</sub> H <sub>6</sub>    | 27.0 ± 1.3    | 28.2 ± 1.2                   | 31.6 ± 1.5                   | 45.1 ± 0.2                   |
| C <sub>3</sub> H <sub>8</sub>    | 26.6 ± 1.1    | 29.1 ± 1.2                   | 33.1 ± 1.4                   | 41.8 ± 0.3                   |
| n-C <sub>4</sub> H <sub>10</sub> | 36.7 ± 2.2    | 40.8 ± 2.6                   | 43.1 ± 2.5                   | 46.1 ± 0.7                   |
| i-C <sub>4</sub> H <sub>10</sub> | 33.1 ± 1.8    | 28.6 ± 0.9                   | 14.2 ± 6.1                   | 46.8 ± 2.0                   |

**Table S5.** Activation energy of diffusion ( $E_a$ )

| <b>Unit: kJ mol<sup>-1</sup></b> | <b>CdIF-1</b> | <b>a<sub>0.3</sub>CdIF-1</b> | <b>a<sub>0.7</sub>CdIF-1</b> | <b>a<sub>1.0</sub>CdIF-1</b> |
|----------------------------------|---------------|------------------------------|------------------------------|------------------------------|
| C <sub>2</sub> H <sub>4</sub>    | 7.10 ± 2.38   | 7.68 ± 1.31                  | 14.78 ± 1.22                 | 15.70 ± 1.98                 |
| C <sub>2</sub> H <sub>6</sub>    | 6.12 ± 1.45   | 8.94 ± 0.56                  | 15.75 ± 0.82                 | 19.85 ± 0.81                 |
| C <sub>3</sub> H <sub>6</sub>    | 8.29 ± 2.11   | 10.82 ± 0.87                 | 12.97 ± 3.67                 | 17.63 ± 2.89                 |
| C <sub>3</sub> H <sub>8</sub>    | 8.49 ± 0.49   | 12.20 ± 3.27                 | 20.10 ± 8.12                 | 54.49 ± 9.12                 |
| n-C <sub>4</sub> H <sub>10</sub> | 10.08 ± 1.63  | 15.04 ± 0.55                 | 22.81 ± 14.41                | 29.02 ± 9.04                 |
| i-C <sub>4</sub> H <sub>10</sub> | 12.54 ± 4.93  | 17.87 ± 4.70                 | 24.12 ± 5.55                 | 33.20 ± 0.56                 |
